# Supplementary material for: Synthesis, characterization and computational studies of Zn complex based on the 8-hydroxyquinoline group containing benzimidazole
Source: Royal Society of Chemistry journal article supplement (doi:10.1039/d0ra05168c), 2020-01-01
Supplement: d0ra05168c1.pdf [file d0ra05168c1.pdf]

## Supplementary Information

# Synthesis, Characterization and computational studies of Zn complex based on 8-hydroxyquinoline group containing benzimidazole

*Shanji Li, Huawen Wen\*, Ningning Yuan, Pengbo Xie, Jinlan Qin, Zhengfang Wang*

School of Petrochemical Engineering, Guangzhou Institute of Technology, Guangzhou, 510725 China

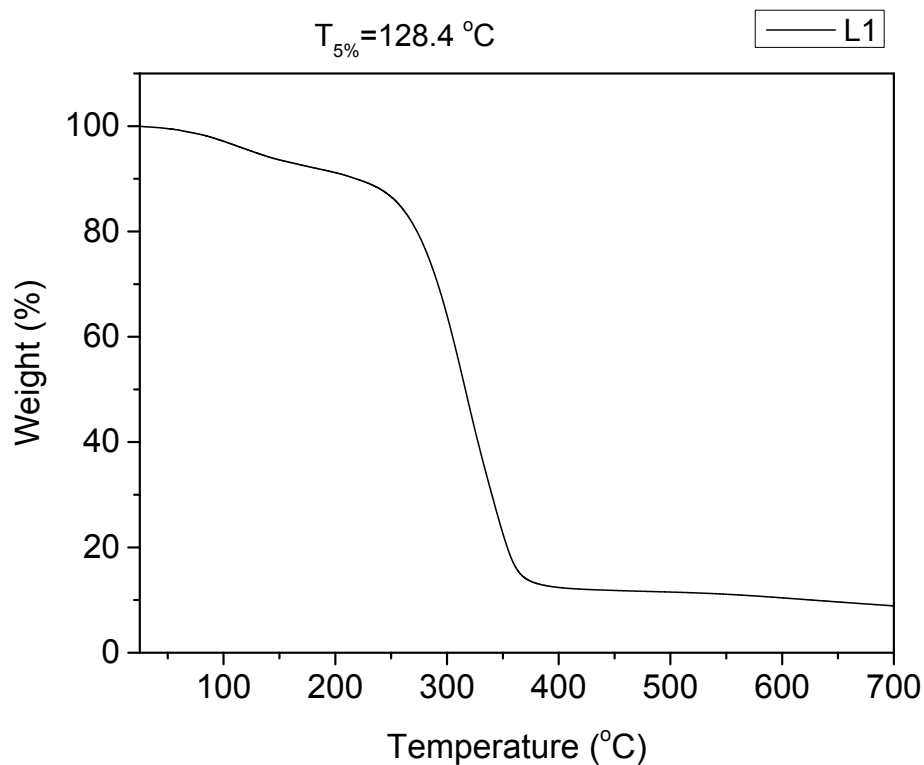

Fig. S1. TGA curves of compound L1 at a heating rate 20 K min<sup>-1</sup>

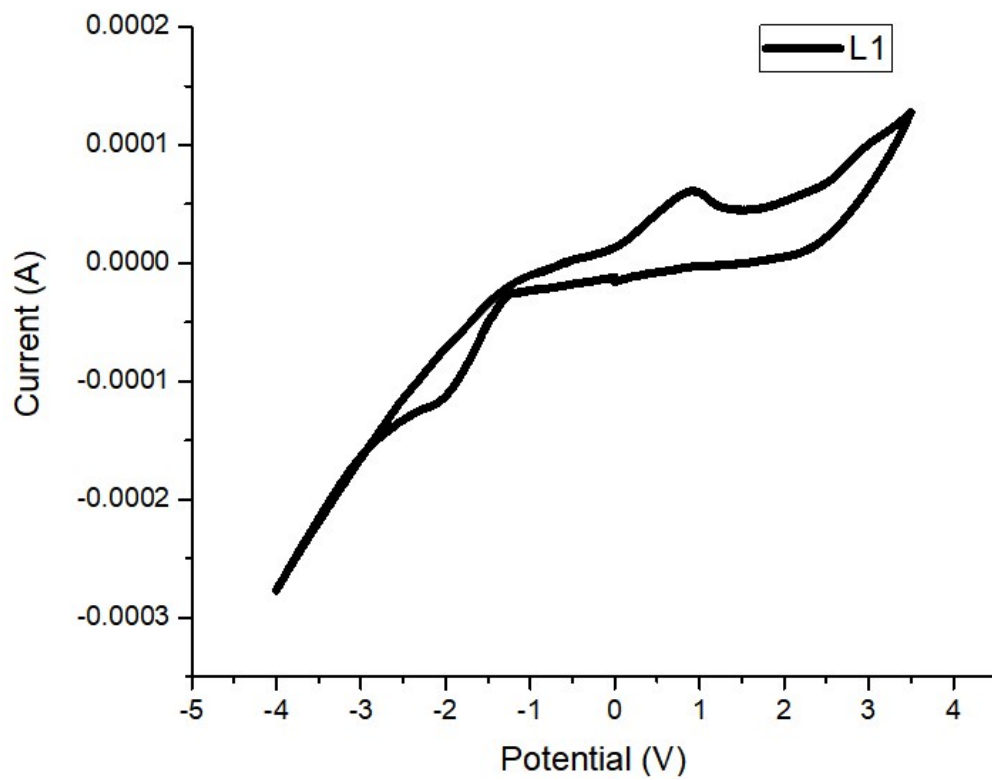

Fig. S2. Cyclic voltammograms of L1 in a solution of n-Bu<sub>4</sub>NPF<sub>6</sub> (0.1 M) in DMSO

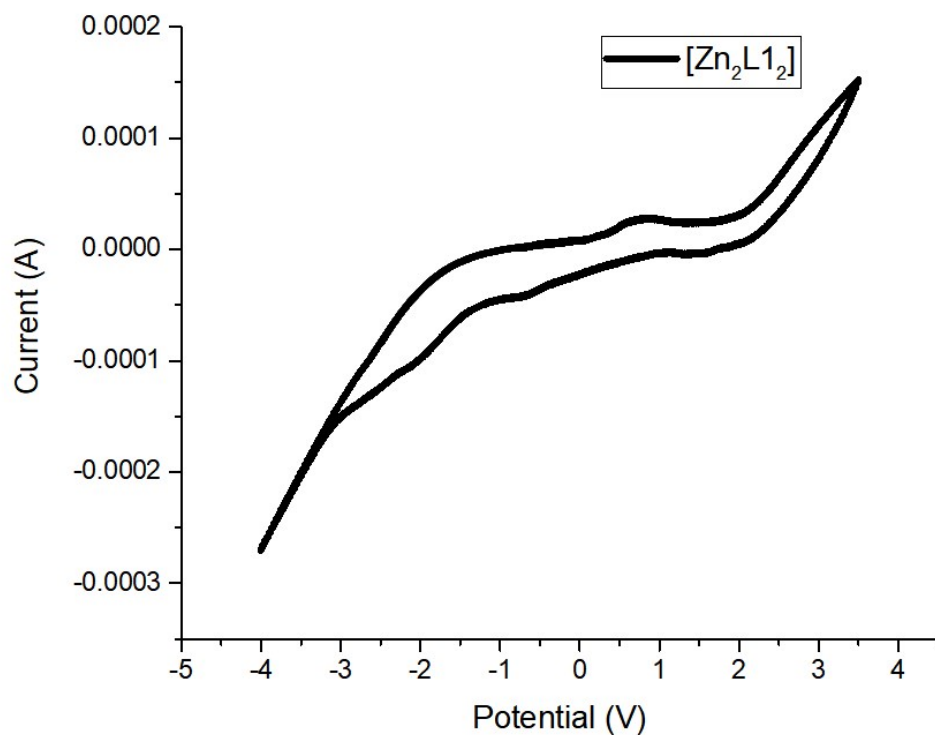

Fig. S3. Cyclic voltammograms of  $[Zn_2L1_2]$  in a solution of  $n\text{-Bu}_4\text{NPF}_6$  (0.1 M) in DMSO

Table S1. Crystal data and structure refinement for L1

|                   |                      |
|-------------------|----------------------|
| Empirical formula | $C_{28}H_{24}N_4O_3$ |
| Formula weight    | 464.51               |
| Temperature/K     | 150.01(10)           |
| Crystal system    | monoclinic           |
| Space group       | $P2_1/n$             |
| a/Å               | 8.8401(2)            |
| b/Å               | 15.7704(3)           |
| c/Å               | 16.9216(5)           |

|                                               |                                                               |
|-----------------------------------------------|---------------------------------------------------------------|
| $\alpha/^\circ$                               | 90.00                                                         |
| $\beta/^\circ$                                | 104.928(3)                                                    |
| $\gamma/^\circ$                               | 90.00                                                         |
| Volume/ $\text{\AA}^3$                        | 2279.45(10)                                                   |
| Z                                             | 4                                                             |
| $\rho_{\text{calc}}/\text{g/cm}^3$            | 1.354                                                         |
| $\mu/\text{mm}^{-1}$                          | 0.726                                                         |
| F(000)                                        | 976.0                                                         |
| Crystal size/ $\text{mm}^3$                   | $0.30 \times 0.30 \times 0.20$                                |
| Radiation                                     | Cu $K\alpha$ ( $\lambda = 1.54184$ )                          |
| $2\theta$ range for data collection/ $^\circ$ | 7.78 to 133.86                                                |
| Index ranges                                  | $-10 \leq h \leq 6, -18 \leq k \leq 18, -19 \leq l \leq 20$   |
| Reflections collected                         | 19470                                                         |
| Independent reflections                       | 4047 [ $R_{\text{int}} = 0.0369, R_{\text{sigma}} = 0.0230$ ] |
| Data/restraints/parameters                    | 4047/0/350                                                    |
| Goodness-of-fit on $F^2$                      | 1.024                                                         |
| Final R indexes [ $I \geq 2\sigma(I)$ ]       | $R_1 = 0.0431, wR_2 = 0.1188$                                 |
| Final R indexes [all data]                    | $R_1 = 0.0537, wR_2 = 0.1309$                                 |
| Largest diff. peak/hole / $e \text{\AA}^{-3}$ | 0.19/-0.23                                                    |

---

Table S2. Selected bond distances ( $\text{\AA}$ ) and bond angles ( $^\circ$ ) with estimated standard deviations (e.s.d.s) in parentheses for L1

---

C1 - O1 1.360 (2)    C21 - C22 1.417 (2)

|         |           |            |            |
|---------|-----------|------------|------------|
| C4- C5  | 1.414 (3) | C22- N4    | 1.370 (2)  |
| C5- C9  | 1.410 (3) | C23- O2    | 1.348 (2)  |
| C6- N1  | 1.361 (2) | C24- C25   | 1.389 (3)  |
| C7- N1  | 1.319 (2) | O3 - C27   | 1.433 (9)  |
| C10- N2 | 1.377 (2) | C27- H27D  | 0.9900     |
| C10- N3 | 1.322 (2) | C27- C28   | 1.469 (9)  |
| C11- N3 | 1.387 (2) | C28- H28F  | 0.9800     |
| C12- N2 | 1.385 (2) | O3' - C27' | 1.358 (14) |
| C17- N2 | 1.468 (2) | C28'- H28B | 0.9800     |
| C18- N4 | 1.316 (2) |            |            |

---

|             |             |               |             |
|-------------|-------------|---------------|-------------|
| O1- C1- C2  | 121.26 (16) | C26- C21- C22 | 119.61 (16) |
| O1- C1- C6  | 118.49 (15) | C21- C22- C23 | 118.34 (16) |
| C1- C2- C3  | 120.24 (18) | N4- C22- C21  | 122.69 (15) |
| C4- C3- C2  | 121.31 (17) | N4- C22- C23  | 118.96 (15) |
| C6- C5- C4  | 118.97 (17) | O2- C23- C22  | 121.27 (16) |
| N1- C6- C5  | 123.57 (15) | C7- N1- C6    | 117.82 (14) |
| C8- C7- C10 | 119.15 (15) | C10- N2- C12  | 106.20 (13) |
| N1- C7- C8  | 122.92 (15) | C10- N2- C17  | 130.66 (13) |
| N1- C7- C10 | 117.93 (14) | C12- N2- C17  | 123.09 (14) |
| C9- C8- C7  | 119.20 (17) | C10- N3- C11  | 105.13 (14) |
| C8- C9- C5  | 120.16 (17) | C18- N4- C22  | 118.11 (14) |

---

Table S3. Crystal data and structure refinement for [Zn<sub>2</sub>L1<sub>2</sub>]

---

|                                                |                                                                   |
|------------------------------------------------|-------------------------------------------------------------------|
| Empirical formula                              | $C_{52}H_{32}N_8O_4Zn_2$                                          |
| Formula weight                                 | 963.60                                                            |
| Temperature/K                                  | 150.00(10)                                                        |
| Crystal system                                 | triclinic                                                         |
| Space group                                    | P-1                                                               |
| a/Å                                            | 11.4106(3)                                                        |
| b/Å                                            | 12.2137(3)                                                        |
| c/Å                                            | 20.5158(6)                                                        |
| $\alpha/^\circ$                                | 87.203(2)                                                         |
| $\beta/^\circ$                                 | 76.153(2)                                                         |
| $\gamma/^\circ$                                | 70.627(2)                                                         |
| Volume/Å <sup>3</sup>                          | 2617.48(12)                                                       |
| Z                                              | 2                                                                 |
| $\rho_{\text{calc}}/\text{g/cm}^3$             | 1.223                                                             |
| $\mu/\text{mm}^{-1}$                           | 1.519                                                             |
| F(000)                                         | 984.0                                                             |
| Crystal size/mm <sup>3</sup>                   | 0.3 × 0.2 × 0.15                                                  |
| Radiation                                      | CuK $\alpha$ ( $\lambda = 1.54178$ )                              |
| 2 $\Theta$ range for data collection/ $^\circ$ | 7.68 to 150.28                                                    |
| Index ranges                                   | -9 ≤ h ≤ 14, -15 ≤ k ≤ 13, -25 ≤ l ≤ 24                           |
| Reflections collected                          | 21878                                                             |
| Independent reflections                        | 10412 [ $R_{\text{int}} = 0.0628$ , $R_{\text{sigma}} = 0.0759$ ] |
| Data/restraints/parameters                     | 10412/0/713                                                       |
| Goodness-of-fit on F <sup>2</sup>              | 1.040                                                             |

Final R indexes [ $I \geq 2\sigma(I)$ ]  $R_1 = 0.0673$ ,  $wR_2 = 0.1809$

Final R indexes [all data]  $R_1 = 0.0841$ ,  $wR_2 = 0.1992$

Largest diff. peak/hole /  $e \text{ \AA}^{-3}$  1.24/-0.92

---

Table S4. Selected bond distances ( $\text{\AA}$ ) and bond angles ( $^\circ$ ) with estimated standard deviations (e.s.d.s) in parentheses for  $[\text{Zn}_2\text{L1}_2]$

---

|      |      |           |       |        |           |
|------|------|-----------|-------|--------|-----------|
| Zn1- | O4   | 2.021 (3) | O0AA- | C0FA   | 1.315 (5) |
| Zn1- | N5   | 2.186 (3) | O2AA- | C8CA   | 1.304 (5) |
| Zn1- | N7CA | 2.162 (3) | O4    | - C8EA | 1.318 (5) |
| Zn1- | N20  | 2.041 (3) | O11   | - C0AA | 1.321 (5) |
| Zn1- | O0AA | 1.999 (3) | O6    | - C5   | 1.410 (9) |
| Zn2- | O2AA | 2.021 (3) | N2    | - C7DA | 1.458 (5) |
| Zn2- | O11  | 1.997 (3) | N2    | - C8AA | 1.357 (5) |
| Zn2- | N5CA | 2.166 (3) | N2    | - C9AA | 1.388 (5) |
| Zn2- | N7   | 2.195 (3) | N5    | - C0CA | 1.325 (5) |
| Zn2- | N19  | 2.077 (3) | N7    | - C3AA | 1.361 (5) |

---

---

|       |       |        |             |       |         |       |           |
|-------|-------|--------|-------------|-------|---------|-------|-----------|
| O0AA- | Zn1   | - N5   | 79.13 (12)  | N7    | - C2AA- | C6CA  | 114.0 (3) |
| O4    | - Zn1 | - N20  | 95.32 (12)  | C0EA- | C2BA-   | C7DA  | 116.8 (3) |
| N20   | - Zn1 | - N5   | 96.05 (12)  | C0FA- | O0AA-   | Zn1   | 116.1 (2) |
| O2AA- | Zn2   | - N7   | 167.61 (12) | C8CA- | O2AA-   | Zn2   | 114.0 (2) |
| O2AA- | Zn2   | - N19  | 94.06 (12)  | C8EA- | O4      | - Zn1 | 111.1 (2) |
| O11   | - Zn2 | - O2AA | 89.47 (11)  | C0AA- | O11     | - Zn2 | 116.5 (2) |

O11 - Zn2 - N5CA 124.02 (11) C8AA- N2 - C7DA 125.3 (3)  
N19 - Zn2 - N5CA 112.97 (12) C4BA- N5 - Zn1 109.5 (2)  
N19 - Zn2 - N7 95.36 (11) C7BA- N5CA- Zn2 108.4 (2)  
N7CA- C0DA- C5DA 122.4 (4) C8EA- C8DA- C13 121.3 (4)  
N7CA- C0DA- C8EA 116.8 (3) O4 - C8EA - C0DA 118.3 (3)  
C5DA- C0DA- C8EA 120.8 (4) O4 - C8EA - C8DA 124.1 (4)  
C9EA - C0EA- C2BA 119.6 (4) C8DA- C8EA - C0DA 117.6 (4)

---
